# Supplementary material
Source: publisher figshare collection journal article supplement (https://acs.figshare.com/ndownloader/files/21786441)
Supplement: Supplementary file 1 [file 21786441]

## Sheet: target by reversal and decoy by
Shifted Reversal				de Bruijn
Peptide	EValue	Protein	ScanNum	Peptide	EValue	Protein
R.YALQM+15.995EQLNGILLHLESELAQTR.A	0.0021899	sp|P05783|K1C18_HUMAN	103141	-.M+15.995SVC+57.021MPTLSPRLLHLELTRMKR.E	0.0016271	DeBruijnsp|Q9Y3A5|SBDS_HUMAN	EValue<=0.01, DeBruijn decoy PSMs
K.TMQTLLSLVR.Q	0.10156	sp|P00492|HPRT_HUMAN	74602	M.LTRLPDYRK.E	0.0041849	DeBruijnsp|O75971|SNPC5_HUMAN
R.YALQM+15.995EQLNGILLHLESELAQTR.A	0.016683	sp|P05783|K1C18_HUMAN	103377	-.M+15.995SVC+57.021MPTLSPRLLHLELTRMKR.E	0.0045207	DeBruijnsp|Q9Y3A5|SBDS_HUMAN
K.IDKLMIEMDGTENK.S	0.015054	sp|P06733|ENOA_HUMAN	48841	R.LETQ+0.984EISQSIETMK.K	0.0060016	DeBruijnsp|Q86UQ4|ABCAD_HUMAN
R.TISETIER.L	0.028499	sp|P26639|SYTC_HUMAN	25175	K.ITSETLQ+0.984R.C	0.012186	DeBruijnsp|Q8NEG4|FA83F_HUMAN
K.LAADDFR.T	0.025236	sp|O76013|KRT36_HUMAN	32574	R.LAADDFR.L	0.025036	DeBruijnsp|Q4G176|ACSF3_HUMAN
K.WDSHFR.E	0.026526	sp|Q16891|MIC60_HUMAN	21063	R.WDSHFR.S	0.026252	DeBruijnsp|Q9HBH5|RDH14_HUMAN
R.HLQLAVR.N	0.050077	sp|Q8IUE6|H2A2B_HUMAN	21823	R.HIQILGR.S	0.038247	DeBruijnsp|P02549|SPTA1_HUMAN
K.GGVAEAC+57.021PNIR.K	0.084042	sp|Q15813|TBCE_HUMAN	28114	-.M+15.995HQ+0.984ASRQIR.N	0.048196	DeBruijntr|B8ZZR0|B8ZZR0_HUMAN
R.VYAENAIR.K	0.11188	sp|Q9HD42|CHM1A_HUMAN	24103	R.VYWPDKK.D	0.064275	DeBruijnsp|Q8IWY9|CDAN1_HUMAN
R.FFLSSGLIDKVDNFK.S	0.084666	sp|Q9BTV4|TMM43_HUMAN	76659	M.FLEEAPLIDELKWK.E	0.07307	DeBruijnsp|Q2TB90|HKDC1_HUMAN
R.IDIVENR.F	0.081706	sp|P00966|ASSY_HUMAN	31117	K.LN+0.984LVQ+0.984NR.Q	0.089598	DeBruijnsp|Q9UP95|S12A4_HUMAN
Sample: HeLA-1
All the PSMs matched as decoy in de Bruijn and target in shifted reversal (The highlighted one's are de Bruijn decoy PSM with EValue<=0.01)
